# Supplementary material for: Acceptability and Willingness to Pay for a Meal Kit Program for African American Families with Low Income: A Pilot Study
Source: MDPI journal article supplement (doi:10.3390/nu13082881), 2021-08-21
Supplement: s1 [file s1]

Table S1. Recipe Acceptability Assessed During the Intervention

| Recipe                                                      | Recipe Acceptability n (%) |                |                            |                   |                       |
|-------------------------------------------------------------|----------------------------|----------------|----------------------------|-------------------|-----------------------|
|                                                             | Liked a Great Deal         | Liked Somewhat | Neither Liked nor Disliked | Disliked Somewhat | Disliked a Great Deal |
| Summer Salmon                                               | 31 (88.6)                  | 4 (11.4)       | 0 (0.0)                    | 0 (0.0)           | 0 (0.0)               |
| Shrimp Scampi Bake                                          | 31 (88.6)                  | 4 (11.4)       | 0 (0.0)                    | 0 (0.0)           | 0 (0.0)               |
| Pork Chops with Roasted Vegetables                          | 33 (94.3)                  | 2 (5.7)        | 0 (0.0)                    | 0 (0.0)           | 0 (0.0)               |
| Vegetable and Shrimp Stir Fry                               | 27 (79.4)                  | 7 (20.6)       | 0 (0.0)                    | 0 (0.0)           | 0 (0.0)               |
| BBQ Chicken                                                 | 23 (65.7)                  | 10 (28.6)      | 2 (5.7)                    | 0 (0.0)           | 0 (0.0)               |
| Pizza with side salad                                       |                            |                |                            |                   |                       |
| Tuna Pasta Casserole                                        | 20 (58.8)                  | 12 (35.3)      | 1 (2.9)                    | 0 (0.0)           | 1 (2.9)               |
| Chicken Salad with Orange Vinaigrette                       | 22 (64.7)                  | 9 (26.5)       | 2 (5.9)                    | 1 (2.9)           | 0 (0.0)               |
| Hearty Spinach Salad                                        | 28 (84.8)                  | 4 (12.1)       | 0 (0.0)                    | 1 (3.0)           | 0 (0.0)               |
| Stir Fry Vegetables with Beef                               | 28 (82.4)                  | 3 (8.8)        | 3 (8.8)                    | 0 (0.0)           | 0 (0.0)               |
| Tilapia Creole                                              | 21 (70.0)                  | 6 (20.0)       | 1 (3.3)                    | 2 (6.7)           | 0 (0.0)               |
| Barley Jambalaya                                            | 17 (50.0)                  | 12 (35.3)      | 1 (2.9)                    | 3 (8.8)           | 1 (2.9)               |
| Black Bean Quesadillas with Corn, Tomato, and Avocado Salad | 16 (55.2)                  | 9 (31.0)       | 0 (0.0)                    | 3 (10.3)          | 1 (3.4)               |
| Stuffed Pepper Soup                                         | 13 (44.8)                  | 12 (41.4)      | 1 (3.4)                    | 2 (6.9)           | 1 (3.4)               |
| Bean and Rice Burritos                                      | 15 (46.9)                  | 11 (34.4)      | 3 (9.4)                    | 2 (6.3)           | 1 (3.1)               |
| Ginger Glazed Mahi Mahi                                     | 17 (53.1)                  | 7 (21.9)       | 6 (18.8)                   | 1 (3.1)           | 1 (3.1)               |
| Vegetable Stroganoff                                        | 11 (34.4)                  | 12 (37.5)      | 2 (6.3)                    | 5 (15.6)          | 2 (6.3)               |
| Pasta with Chickpeas, Tomato, and Spinach                   | 10 (34.5)                  | 10 (34.5)      | 4 (13.8)                   | 3 (10.3)          | 2 (6.9)               |
| Spaghetti Squash with Meat Sauce                            | 4 (43.8)                   | 8 (25.0)       | 4 (12.5)                   | 2 (6.3)           | 4 (12.5)              |

and Whole Grain  
Roll

---
